# Supplementary material for: Discovering metabolic disease gene interactions by correlated effects on cellular morphology
Source: PubMed Central journal article supplement (PMC6531784; doi:10.1016/j.molmet.2019.03.001), 2019-03-13
Supplement: mmc3.pdf [file mmc3.pdf]

**CRISPR targeting constructs**

| <b>C/EBPa site</b> | <b>targeting specifying sequence for CRISPR (sgRNA)</b> | <b>Orientation</b> |
|--------------------|---------------------------------------------------------|--------------------|
| S1-1               | GCATAAATTACGGTCGATCCAGG                                 | Reverse            |
| S1-2               | GCAACCAAGTGTCTCTTGGTGGG                                 | Forward            |
| S1-3               | TTGCATAATGTTCTGTTTCCTGG                                 | Forward            |
| S2-1               | CCAGCCAGTGGCTTTTGAATGG                                  | Forward            |
| S2-2               | CAGGCCATTGCAAAGCCACTGG                                  | Reverse            |
| S2-3               | CCATTGCAAAGCCACTGGCTGG                                  | Reverse            |
| W-1                | CGCACACTCAGGGGAACTGCAGG                                 | Reverse            |
| W-2                | TGGTAGCACCCGCACACTCAGGG                                 | Reverse            |
| W-3                | AGCACCTCAGGCTGATGGGG                                    | Reverse            |
| W-4                | AGCATTGCCCCATCAGCTGAGG                                  | Forward            |
| Intron1C           | CAAGGCGGGATGGGTCCATAGGG                                 | Reverse            |

**Genomic DNA sequencing primers**

| <b>C/EBPa site</b> | <b>Forward primer</b>                       | <b>Reverse primer</b>                        |
|--------------------|---------------------------------------------|----------------------------------------------|
| S1                 | ccatctcatccctgcgtgtctccgcaaggctccgtctcaaaa  | cctctctatgggcagtcggtgatgagccagttgtgcaaacagtg |
| S2                 | ccatctcatccctgcgtgtctcccctctccctgttagccg    | cctctctatgggcagtcggtgatgactgcccctggaaccac    |
| W-ChIP peak        | ccatctcatccctgcgtgtctccgctggattgcgcaaatgagt | cctctctatgggcagtcggtgatgatctgccttctcagccaac  |
| W-motif            | ccatctcatccctgcgtgtctcccccttgactcagtttccc   | cctctctatgggcagtcggtgatggttccatgcgacacaacc   |
| Intron1C           | ccatctcatccctgcgtgtctcccctgactcctacacatccg  | cctctctatgggcagtcggtgatgctggtgtttccgacaagtgt |
